# Supplementary material
Source: PubMed Central journal article supplement (PMC3938585)

Figure S1

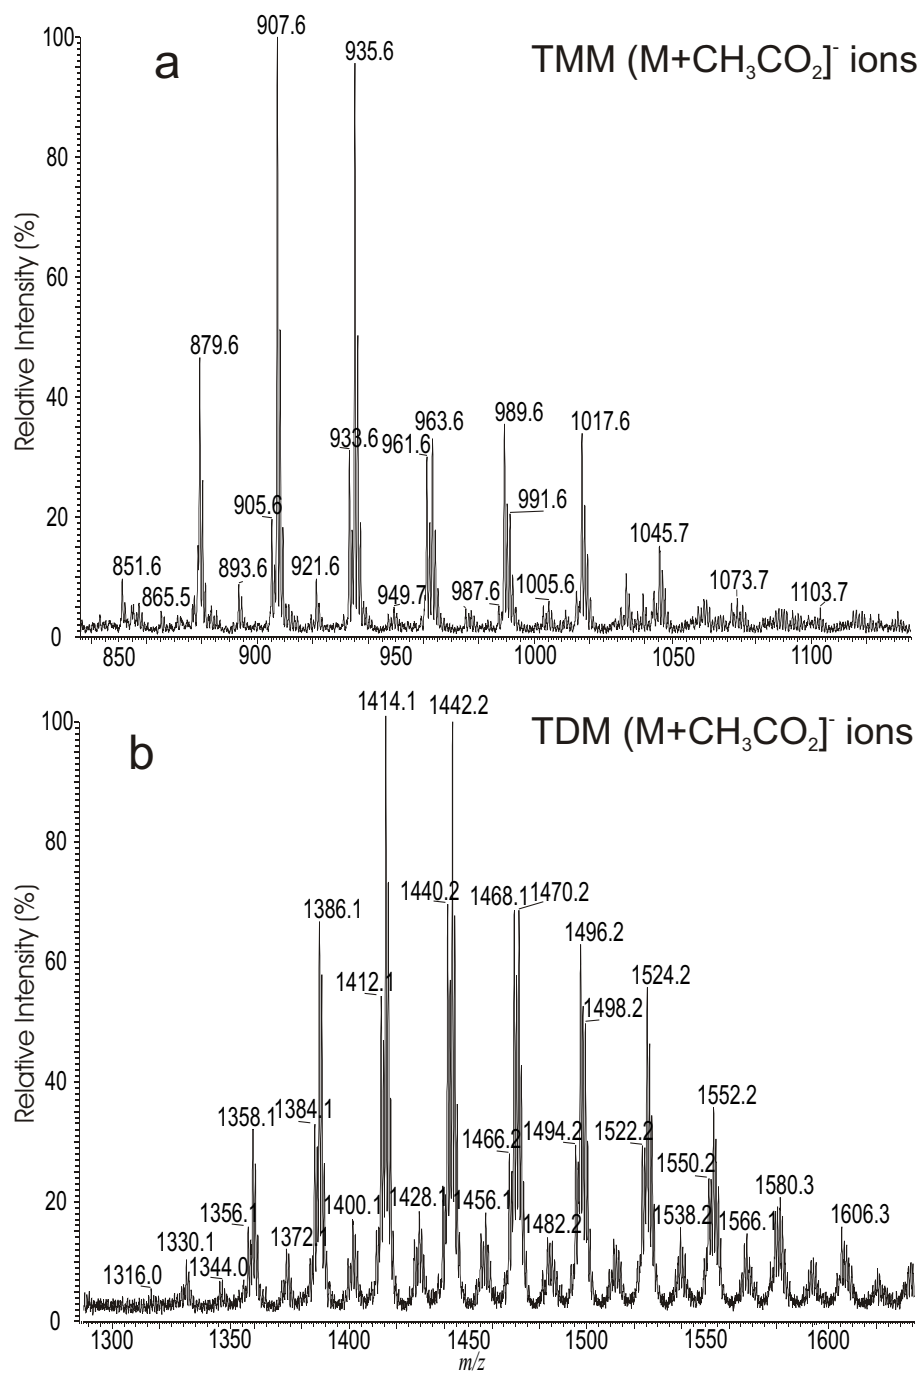

Supplement: NIHMS555457-supplement-f1.pdf [file NIHMS555457-supplement-f1.pdf]

Figure S2

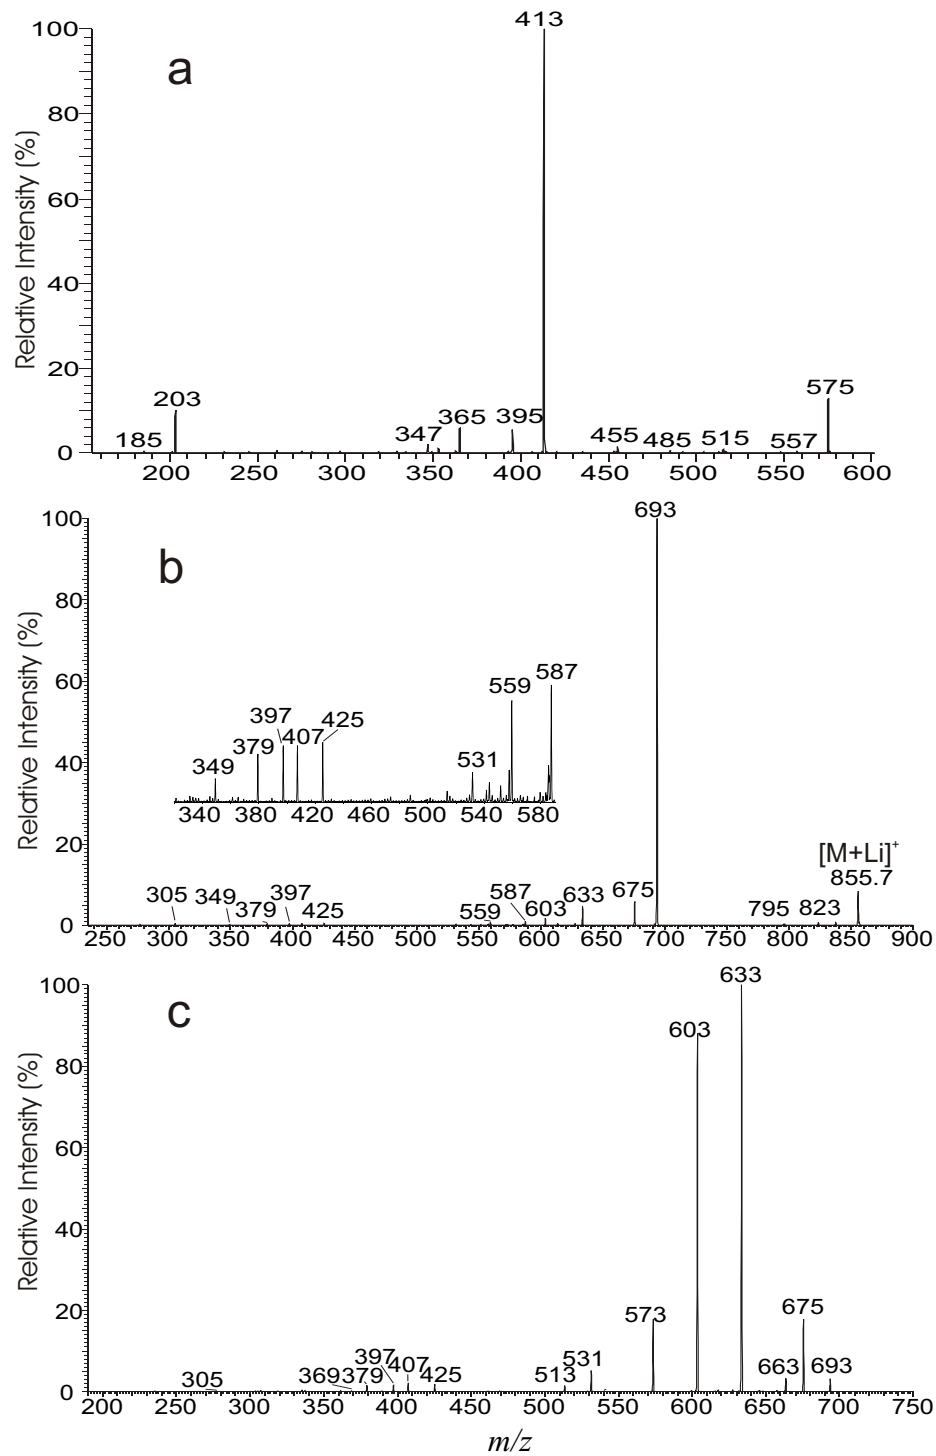

Supplement: NIHMS555457-supplement-f2.pdf [file NIHMS555457-supplement-f2.pdf]

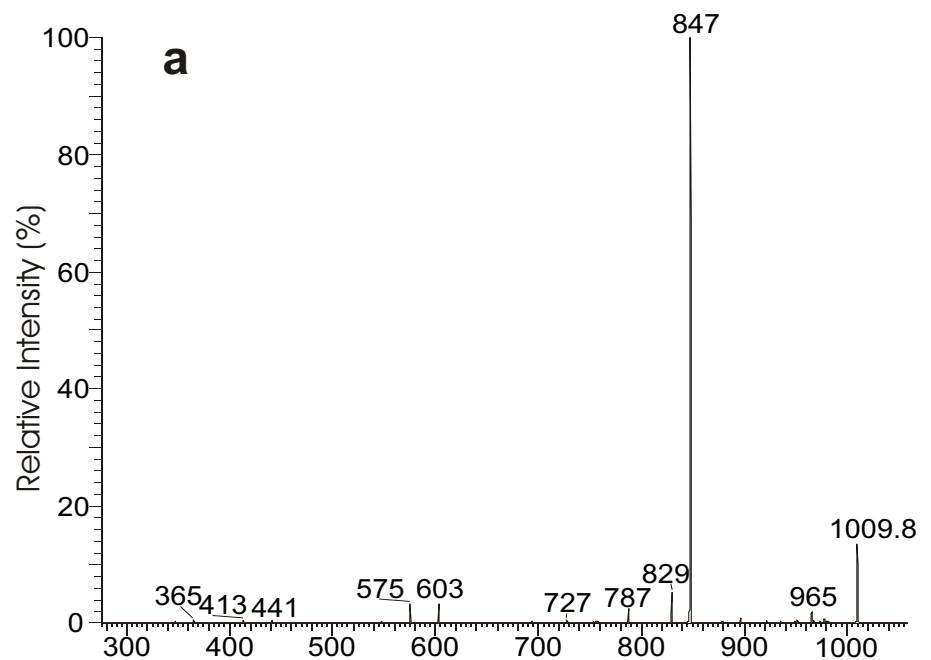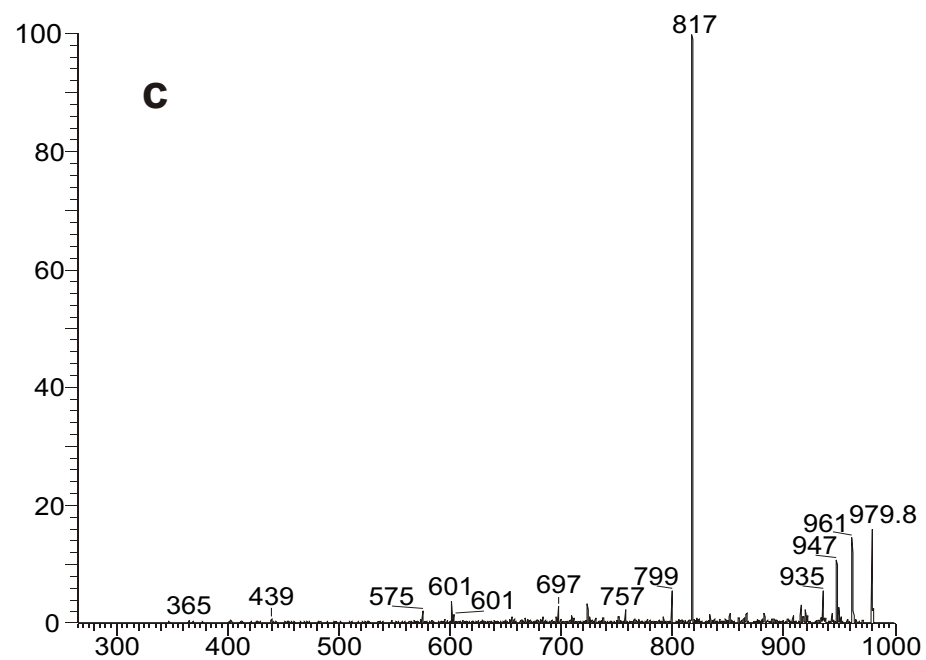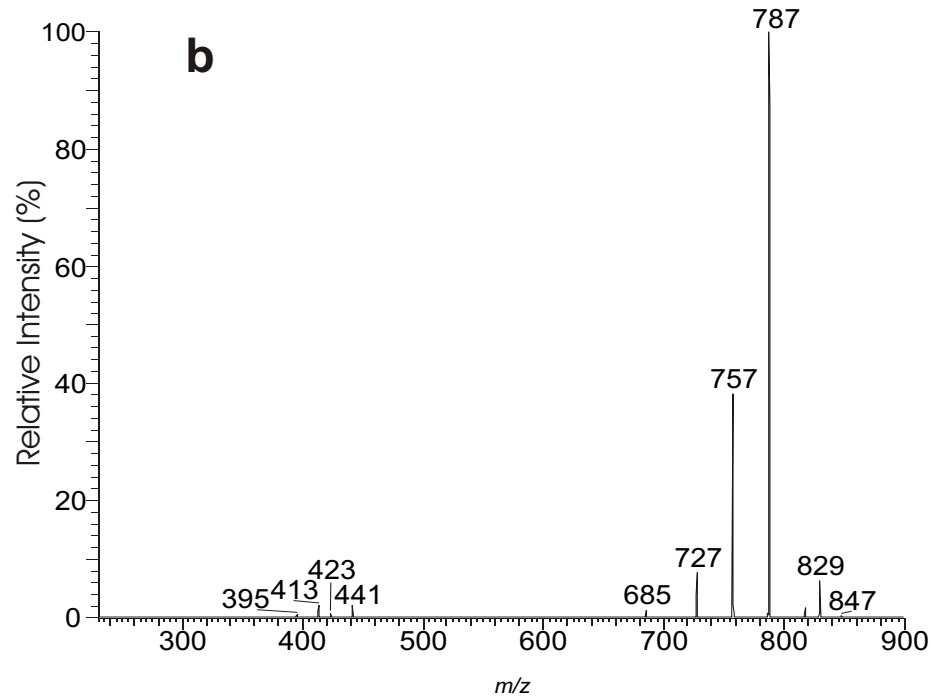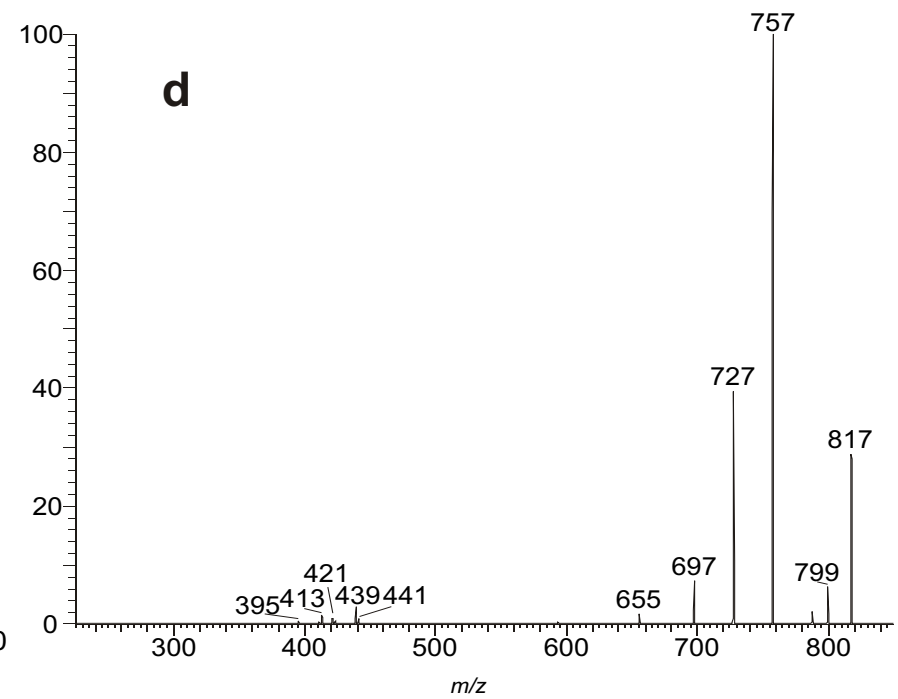

Supplement: NIHMS555457-supplement-f3.pdf [file NIHMS555457-supplement-f3.pdf]

Figure S4

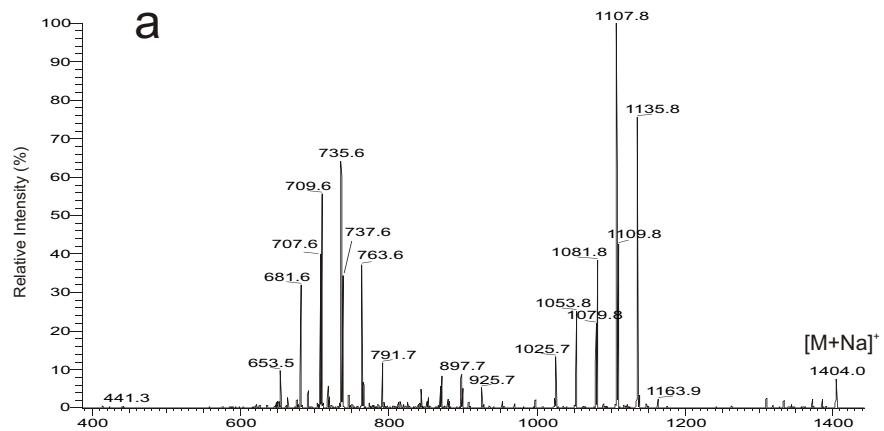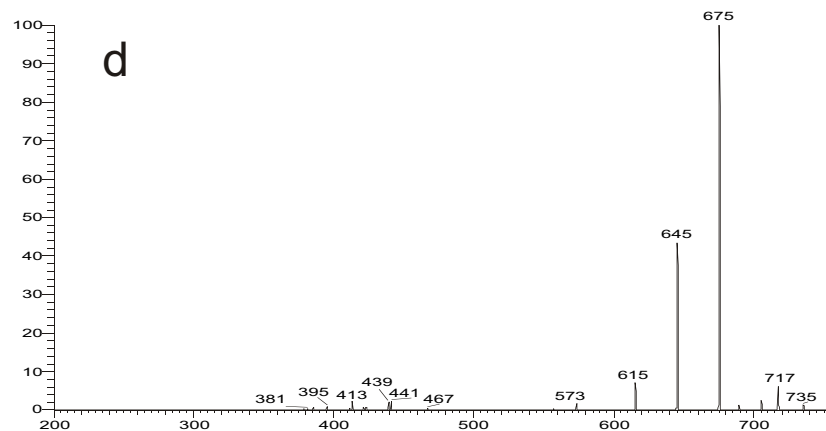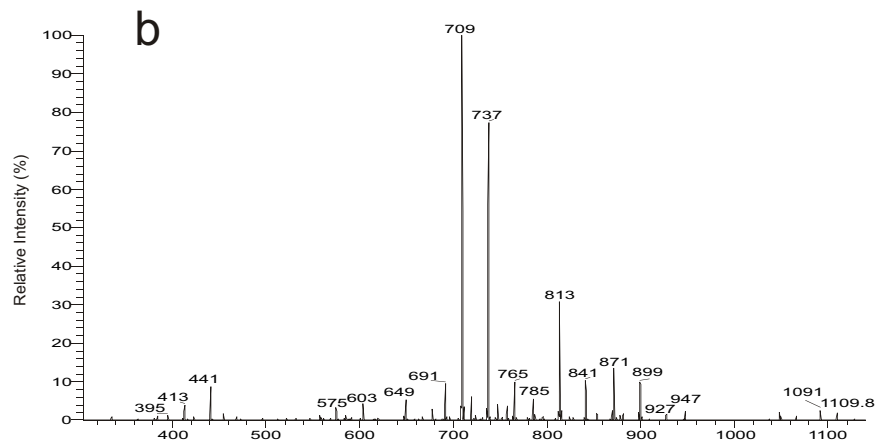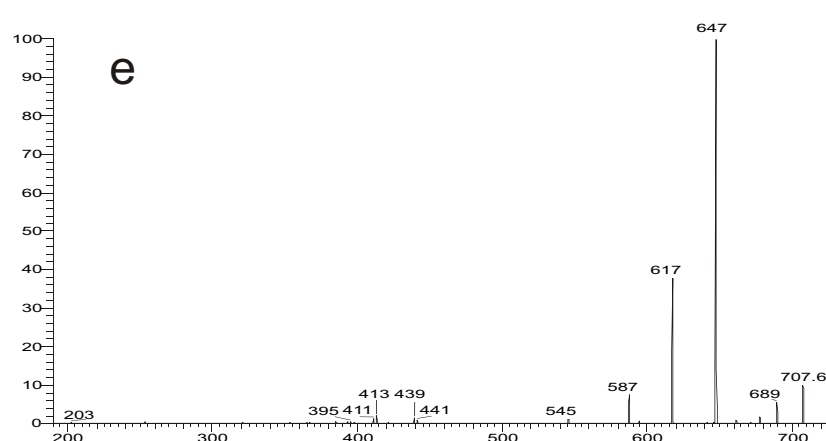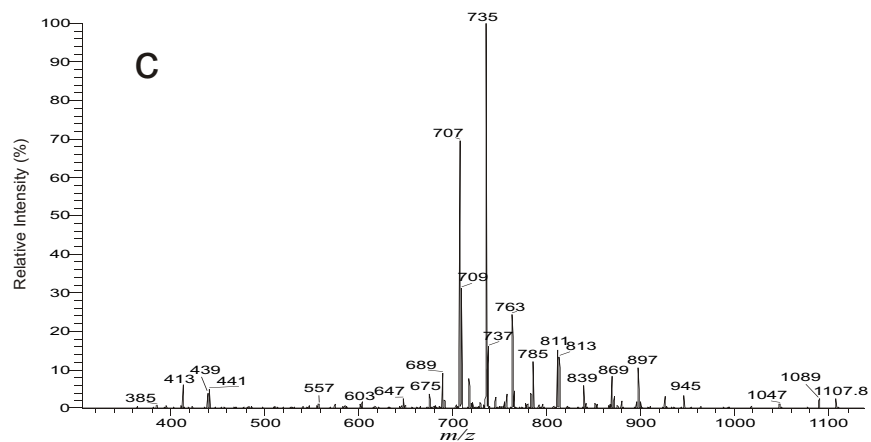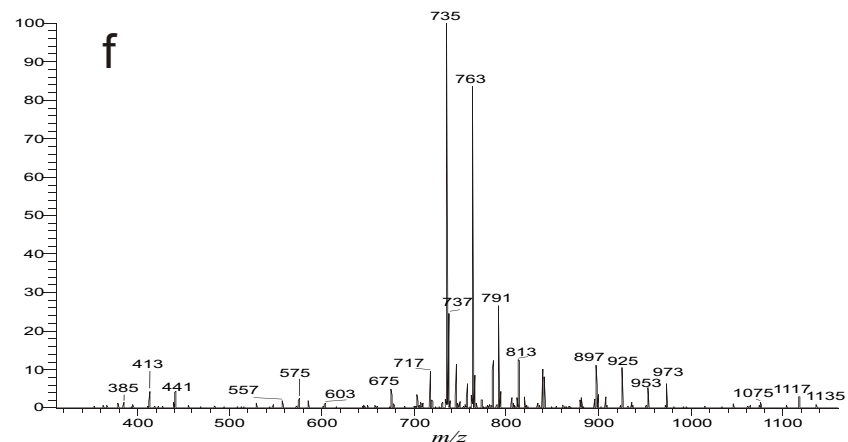

Supplement: NIHMS555457-supplement-f4.pdf [file NIHMS555457-supplement-f4.pdf]

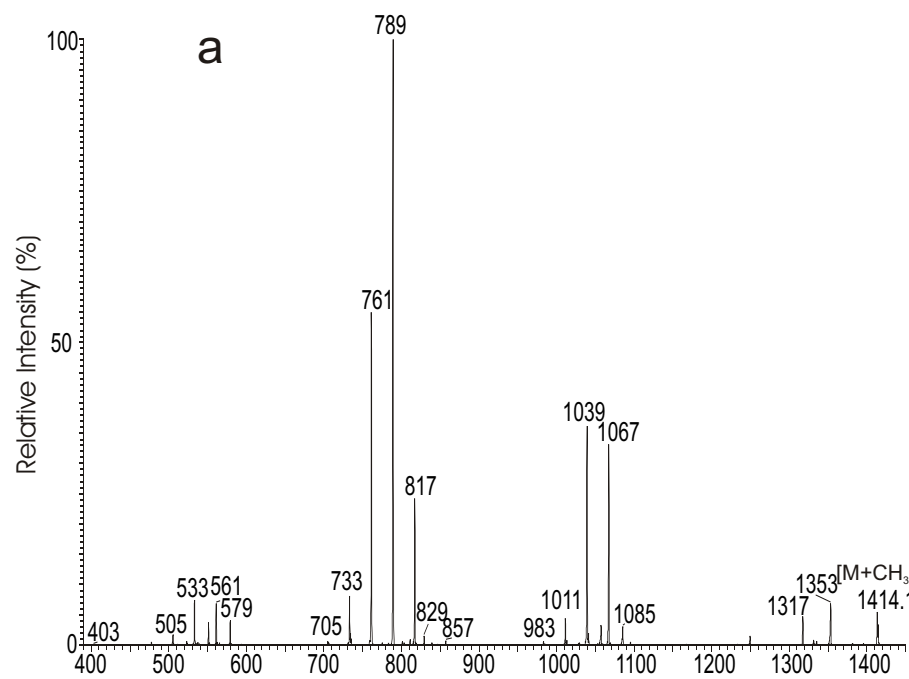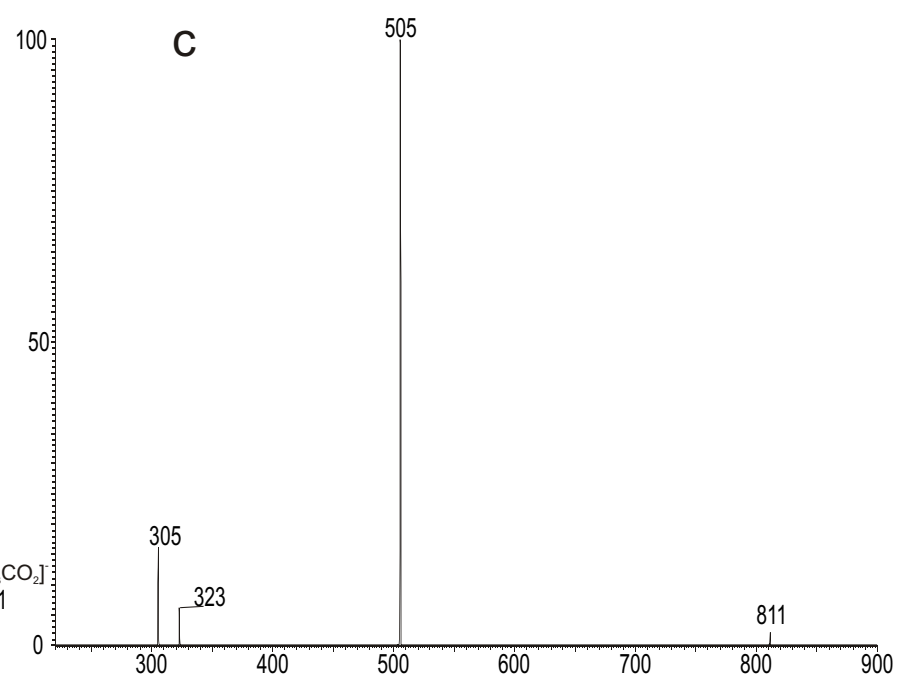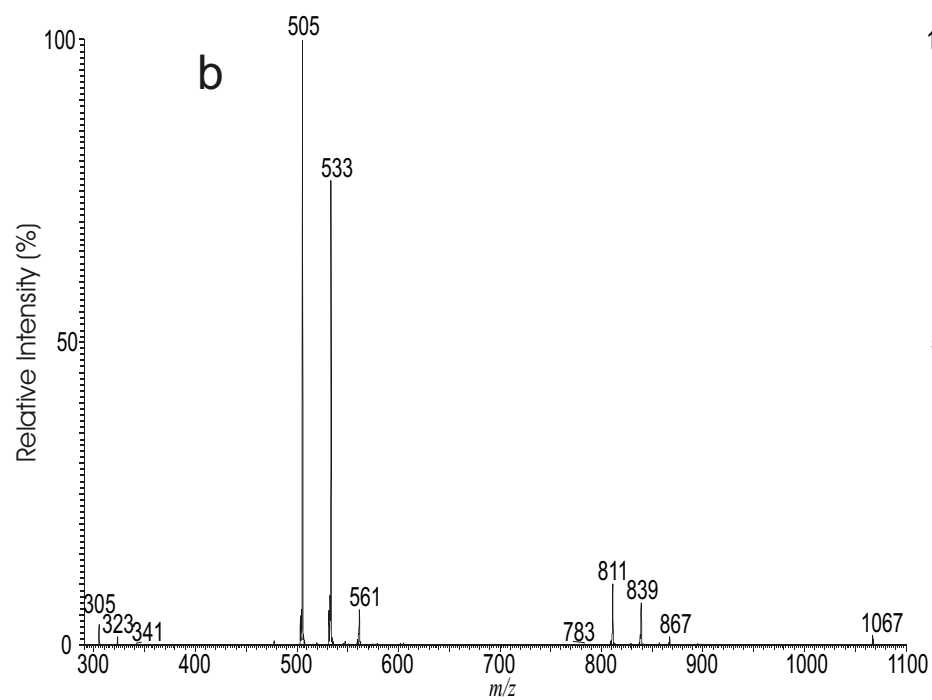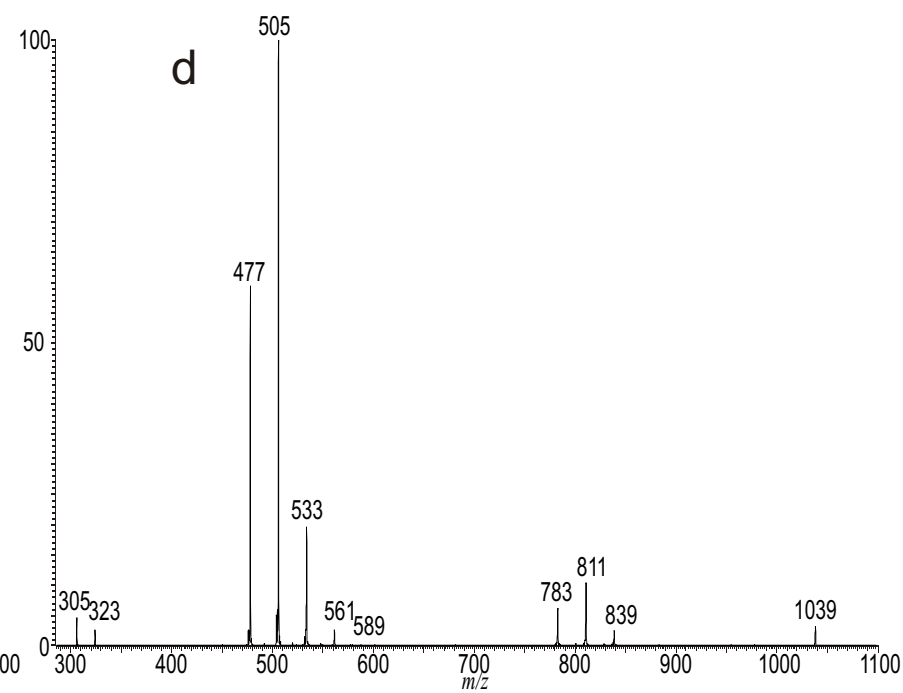

Supplement: NIHMS555457-supplement-f5.pdf [file NIHMS555457-supplement-f5.pdf]
